# Supplementary material
Source: publisher site journal article supplement (https://www.spandidos-publications.com/8665/downloadSupplementary)

Figure S1. Rat primary peritoneal mesothelial cells were treated with different concentrations of aspirin (1 and 3 mM) or 0.1% DMSO for 24 h, followed by CCK-8 analysis. The OD values were normalized to those of the control group. \*\*P<0.01. OD, optical density.

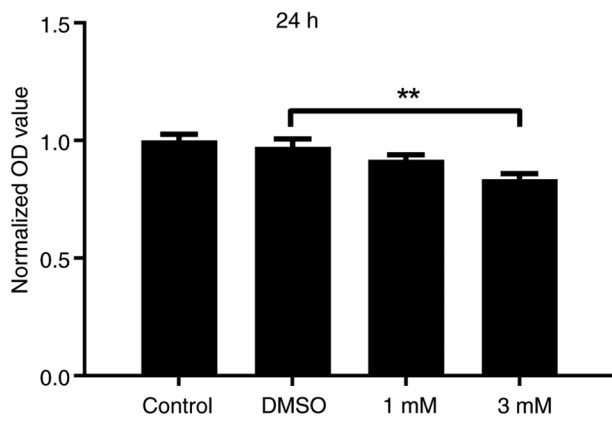

Supplement: Supplementary file 1 [file downloadSupplementary]
